# Supplementary material for: Evaluating the Therapeutic Mechanisms of Selected Active Compounds in Cornus Officinalis and Paeonia Lactiflora in Rheumatoid Arthritis via Network Pharmacology Analysis
Source: Front Pharmacol. 2021 Apr 21;12:648037. doi: 10.3389/fphar.2021.648037 (PMC8097135; doi:10.3389/fphar.2021.648037)
Supplement: Supplementary file 1 [file table1.docx]

**Supplementary Materials**

**Evaluating the therapeutic mechanisms of selected active compounds in Cornus officinalis and Paeonia lactiflora in rheumatoid arthritis via network pharmacology analysis**

**Qinglin Li1,2, Shaoqi Hu1, Lichuang Huang1, Jida Zhang3,*, Gang Cao1,***

1School of Pharmacy, Zhejiang Chinese Medical University, Hangzhou, China

2The Cancer Hospital of the University of Chinese Academy of Sciences (Zhejiang Cancer Hospital), Institute of Basic Medicine and Cancer, Chinese Academy of Sciences, Hangzhou, China

3Institute of Basic Research in Clinical Medicine, College of Basic Medical Science, Zhejiang Chinese Medical University, Hangzhou, China

***Correspondence**

Gang Cao
cgang1126@163.com

Jida Zhang
zhjd82@tom.com

**Table S1. Common gene targets of rheumatoid arthritis between OMIM, GenCLiP3, CTD, and GeneCards database.**

| IL1B |
| --- |
| IFNG |
| IL6 |
| IL10 |
| VEGFA |
| STAT1 |
| STAT4 |
| IL18 |
| TNFAIP3 |
| IL6ST |
| HLA-DRB1 |
| NCF1 |
| MIF |
| TRAF1 |
| SLC11A1 |
| IRF5 |
| SLC22A4 |
| IL2RB |
| CTLA4 |
| PTPN22 |
| NFKBIL1 |
| PADI4 |
| IL12A |
| CD244 |
| TNF |
| IL1RN |
| STAT3 |
| IL17A |
| FOS |
| TNFRSF1A |
| CD44 |
| PLA2G4A |
| CDKN1A |
| TP53 |
| S100A9 |
| SPP1 |
| IL3 |
| STAT6 |
| LGALS3 |
| CXCL12 |
| PTGES |
| HLA-C |
| TBX21 |
| SAA1 |
| SOCS3 |
| HLA-G |
| BMP2 |
| NOD2 |
| MAPKAPK2 |
| PSMB8 |
| NLRP3 |
| CCR2 |
| GUSB |
| PLA2G2A |
| DKK1 |
| CCR5 |
| PDGFB |
| SERPINH1 |
| MMP14 |
| IL2RG |
| FSTL1 |
| IL33 |
| FLT1 |
| MAP3K14 |
| ADAM17 |
| IL1RL1 |
| C5 |
| TNFRSF9 |
| NR4A2 |
| TNFRSF1B |
| TRPC1 |
